# Supplementary material for: A DHODH inhibitor increases p53 synthesis and enhances tumor cell killing by p53 degradation blockage
Source: PubMed Central journal article supplement (PMC5856786; doi:10.1038/s41467-018-03441-3), 2018-03-16
Supplement: 41467_2018_3441_MOESM3_ESM.pdf [file 41467_2018_3441_MOESM3_ESM.pdf]

### **Description of Supplementary Files**

File Name: Supplementary Data 1

Description: The full RNAseq raw data as well as the processed data including the method of analysis.
